# Supplementary material for: Population Genomics of Inversion Polymorphisms in Drosophila melanogaster
Source: PLoS Genet. 2012 Dec 20;8(12):e1003056. doi: 10.1371/journal.pgen.1003056 (PMC3527211; doi:10.1371/journal.pgen.1003056)
Supplement: Table S6 — Inversion genotype calls for each strain in DPGP2. Genotypes are only provided for target chromsomes (column 2). (XLS) [file pgen.1003056.s008.xls]

## Sheet: Sheet1
		In(3L)P	In(2L)t	In(3R)P	In(3R)K	In(2R)NS	In(1)A	In(1)Be
	Total:	5	32	18	23	8	8	8
DPGP_Stock_ID*	Target_Chrs
CK1	X,2L,2R,3L,3R,4,mt			1
CK2	X,2L,2R,3L,3R,4,mt
CO1	X,2L,2R,3L,3R,4,mt				1
Co10b-3	3L,3R,Y				1
CO10N	X,2L,2R,3L,3R,4,mt				1
CO13N	X,2L,2R,3L,3R,4,mt				1
CO14	X,2L,2R,3L,3R,4,mt		1	1
CO15N	X,2L,2R,3L,3R,4,mt				1
CO16	X,2L,2R,3L,3R,4,mt				1
Co16-3	3L,3R,Y			1	1
CO2	X,2L,2R,3L,3R,4,mt				1
CO4N	X,2L,2R,3L,3R,4,mt				1
Co8b-3	3L,3R,Y				1
CO8N	X,2L,2R,3L,3R,4,mt				1
CO9N	X,2L,2R,3L,3R,4,mt				1
ED10N	X,2L,2R,3L,3R,4,mt
ED19-1-3	X,3L,3R
ED2	X,2L,2R,3L,3R,4,mt
ED3	X,2L,2R,3L,3R,4,mt
ED55-2	2L,2R,Y
ED56-2	2L,2R,Y
ED5N	X,2L,2R,3L,3R,4,mt
ED6N	X,2L,2R,3L,3R,4,mt
EZ2	X,2L,2R,3L,3R,4,mt		1
EZ25	X,2L,2R,3L,3R,4,mt		1
EZ5N	X,2L,2R,3L,3R,4,mt
EZ63-1-3	X,3L,3R
EZ9N	X,2L,2R,3L,3R,4,mt		1
FR14	X,2L,2R,3L,3R,4,mt
FR151	X,2L,2R,3L,3R,4,mt
FR180	X,2L,2R,3L,3R,4,mt		1	1
FR207	X,2L,2R,3L,3R,4,mt
FR217	X,2L,2R,3L,3R,4,mt	1			1
FR229	X,2L,2R,3L,3R,4,mt			1
FR310	X,2L,2R,3L,3R,4,mt
FR361	X,2L,2R,3L,3R,4,mt	1		1
FR70	X,2L,2R,3L,3R,4,mt
GA125	X,2L,2R,3L,3R,4,mt		1		1
GA129	X,2L,2R,3L,3R,4,mt		1
GA130	X,2L,2R,3L,3R,4,mt
GA132	X,2L,2R,3L,3R,4,mt			1
GA141	X,2L,2R,3L,3R,4,mt		1
GA145	X,2L,2R,3L,3R,4,mt		1
GA160	X,2L,2R,3L,3R,4,mt		1	1
GA185	X,2L,2R,3L,3R,4,mt			1
GA187	X,3L,3R,4,mt			1
GA191	X,2L,2R,3L,3R,4,mt							1
GU10	X,2L,2R,3L,3R,4,mt				1
GU11-3	3L,3R,Y			1
GU2	X,2L,2R,3L,3R,4,mt
GU3-3	3L,3R,Y
GU6	X,2L,2R,3L,3R,4,mt				1
GU7	X,2L,2R,3L,3R,4,mt		1	1
GU9	X,2L,2R,3L,3R,4,mt			1
KN133N	X,2L,2R,3L,3R,4,mt		1					1
KN20N	X,2L,2R,3L,3R,4,mt				1
KN34	X,2L,2R,3L,3R,4,mt
KN35	X,2L,2R,3L,3R,4,mt		1
KN6	X,2L,2R,3L,3R,4,mt
KN73-1-3	X,3L,3R
KO10-1-3	X,3L,3R
KO2-1-3	X,3L,3R
KO6-1-3	X,3L,3R
KR39	X,2L,2R,3L,3R,4,mt		1					1
KR42	X,2L,2R,3L,3R,4,mt		1			1
KR4N	X,2L,2R,3L,3R,4,mt		1				1
KR54-1-3	X,3L,3R			1
KR68-1-3	X,3L,3R
KR7	X,2L,2R,3L,3R,4,mt		1
KT1	X,2L,2R,3L,3R,4,mt
KT6	X,2L,2R,3L,3R,4,mt					1
NG10N	X,2L,2R,3L,3R,4,mt	1	1	1
NG1N	X,2L,2R,3L,3R,4,mt		1		1	1
NG3N	X,2L,2R,3L,3R,4,mt	1	1
NG6N	X,2L,2R,3L,3R,4,mt
NG7	X,2L,2R,3L,3R,4,mt
NG9	X,2L,2R,3L,3R,4,mt	1	1			1
RC1	X,2L,2R,3L,3R,4,mt
RC5	X,2L,2R,3L,3R,4,mt
RG10	X,2L,2R,3L,3R,4,mt							1
RG11N	X,2L,2R,3L,3R,4,mt							1
RG13N	X,2L,2R,3L,3R,4,mt
RG15	X,2L,2R,3L,3R,4,mt
RG15	X,2L,2R,3L,3R,4,mt
RG18N	X,2L,2R,3L,3R,4,mt			1
RG19	X,2L,2R,3L,3R,4,mt
RG2	X,2L,2R,3L,3R,4,mt
RG21N	X,2L,2R,3L,3R,4,mt							1
RG22	X,2L,2R,3L,3R,4,mt
RG24	X,2L,2R,3L,3R,4,mt
RG25	X,2L,2R,3L,3R,4,mt			1
RG28	X,2L,2R,3L,3R,4,mt
RG3	X,2L,2R,3L,3R,4,mt		1			1
RG32N	X,2L,2R,3L,3R,4,mt
RG33	X,2L,2R,3L,3R,4,mt
RG34	X,2L,2R,3L,3R,4,mt
RG35	X,2L,2R,3L,3R,4,mt
RG35	X,2L,2R,3L,3R,4,mt
RG36	X,2L,2R,3L,3R,4,mt		1
RG37N	X,2L,2R,3L,3R,4,mt		1
RG38N	X,2L,2R,3L,3R,4,mt
RG39	X,2L,2R,3L,3R,4,mt
RG4N	X,2L,2R,3L,3R,4,mt
RG5	X,2L,2R,3L,3R,4,mt			1
RG6N	X,2L,2R,3L,3R,4,mt
RG7	X,2L,2R,3L,3R,4,mt
RG8	X,2L,2R,3L,3R,4,mt
RG9	X,2L,2R,3L,3R,4,mt			1
SP173	X,2L,2R,3L,3R,4,mt
SP188	X,2L,2R,3L,3R,4,mt
SP221	X,2L,2R,3L,3R,4,mt		1			1
SP235	X,2L,2R,3L,3R,4,mt
SP241	X,2L,2R,3L,3R,4,mt
SP254	X,2L,2R,3L,3R,4,mt
SP80	X,2L,2R,3L,3R,4,mt
TZ10	X,2L,2R,3L,3R,4,mt		1				1
TZ14	X,2L,2R,3L,3R,4,mt		1		1		1
TZ8	X,2L,2R,3L,3R,4,mt		1				1
Ug17-3	3L,3R,Y
UG19	X,2L,2R,3L,3R,4,mt
UG28N	X,2L,2R,3L,3R,4,mt
Ug40-3	3L,3R,Y
UG5N	X,2L,2R,3L,3R,4,mt
UG7	X,2L,2R,3L,3R,4,mt
UM118	X,2L,2R,3L,3R,4,mt		1					1
UM37	X,2L,2R,3L,3R,4,mt				1
UM526	X,2L,2R,3L,3R,4,mt		1
ZI261	X,2L,2R,3L,3R,4,mt
ZI268	X,2L,2R,3L,3R,4,mt
ZI468	X,2L,2R,3L,3R,4,mt
ZI91	X,2L,2R,3L,3R,4,mt
ZK131	X,3L,3R,4,mt,Y				1		1
ZK186	X,3R,4,mt,Y							1
ZK84	X,4,mt,Y				1
ZL130	X,2L,2R,3L,3R,4,mt
ZO12	X,2L,2R,3L,3R,4,mt
ZO65	X,2L,2R,3L,3R,4,mt		1			1	1
ZS11	X,2L,2R,3L,3R,4,mt		1
ZS37	X,2L,2R,3L,3R,4,mt				1		1
ZS5	X,2L,2R,3L,3R,4,mt					1	1
ZS56	X,2L,2R,3L,3R,4,mt
